# Supplementary material
Source: publisher figshare collection journal article supplement (https://frontiersin.figshare.com/ndownloader/files/21107760)
Supplement: Supplementary file [file 21107760]

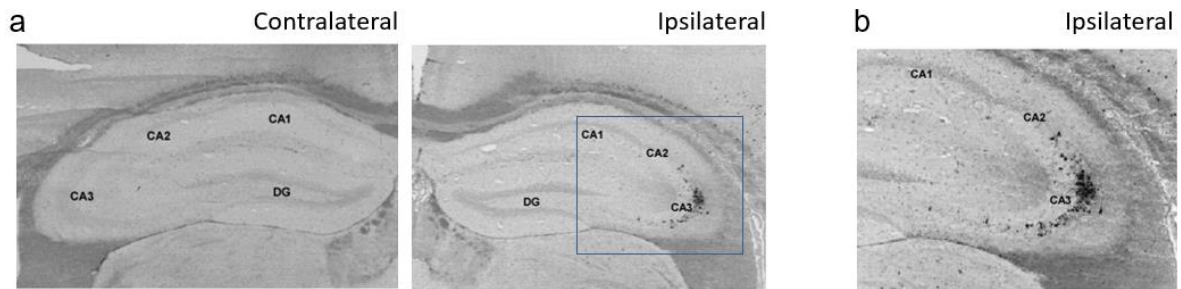

Supplementary Figure 1: *Histology of the seizure-damaged hippocampus in the intraamygdala kainic acid model of status epilepticus*

Figure shows representative brain tissue sections (12  $\mu$ m coronal) stained by the FluoroJade B technique for irreversible cell death. (a) contralateral and ipsilateral side of a representative section obtained 24 h after status epilepticus and (b) high-magnification of the ipsilateral side showing the CA3-predominant lesion. Image is greyscale inverted thereby showing Fluorojade B-positive cells in black.
